# Supplementary material
Source: PubMed Central journal article supplement (PMC4256885)
Supplement: supp_pp.114.247486_247486Supplemental_Data_3.pdf [file supp_pp.114.247486_247486Supplemental_Data_3.pdf]

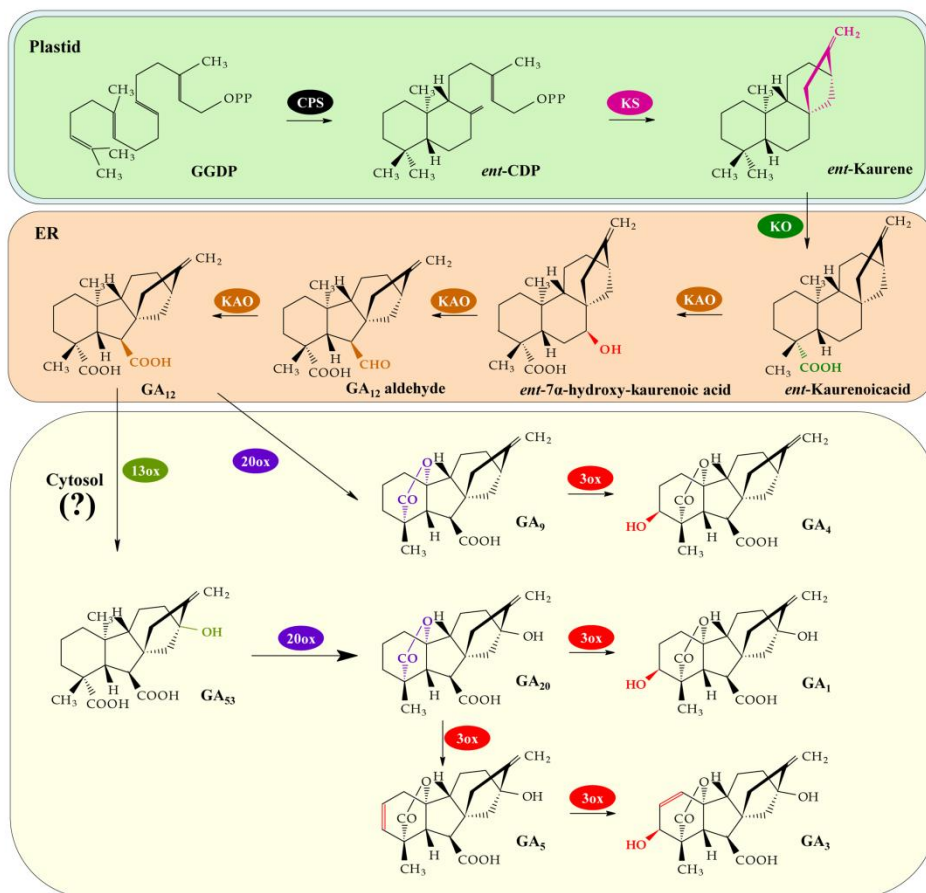

**Supplemental Figure S1. The GA biosynthetic pathway in plants.** GGDP (geranylgeranyl diphosphate); *ent*-CDP (ent-copalyl diphosphate); CPS (ent-copalyl diphosphate synthase); KS (ent-kaurene synthase); KO (ent-kaurene oxidase); KAO (ent-kaurenoic acid oxidase); 13ox (GA 13-oxidase); 20ox (GA 20-oxidase); 3ox (GA 3-oxidase). The chemical group and bonds resulted for each enzyme function are highlighted in color. Cellular compartmentations are labeled. Bioactive GAs are *GA*<sub>1</sub>, *GA*<sub>4</sub> and *GA*<sub>3</sub>.

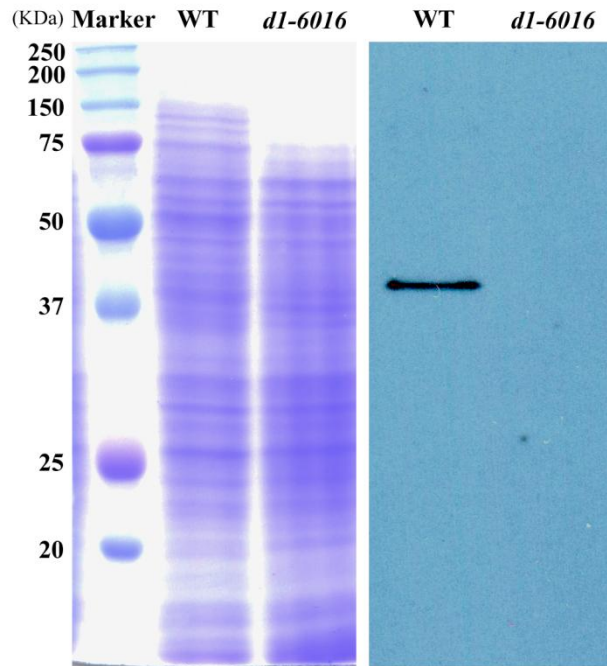

**Supplemental Figure S2. Specificity of the D1 antibody.** Western blot analysis with D1 antibody on total proteins from the *d1-6016* and wild type seedlings (right panel) and Coomassie Blue staining of the loading amount of the two samples (Left panel).

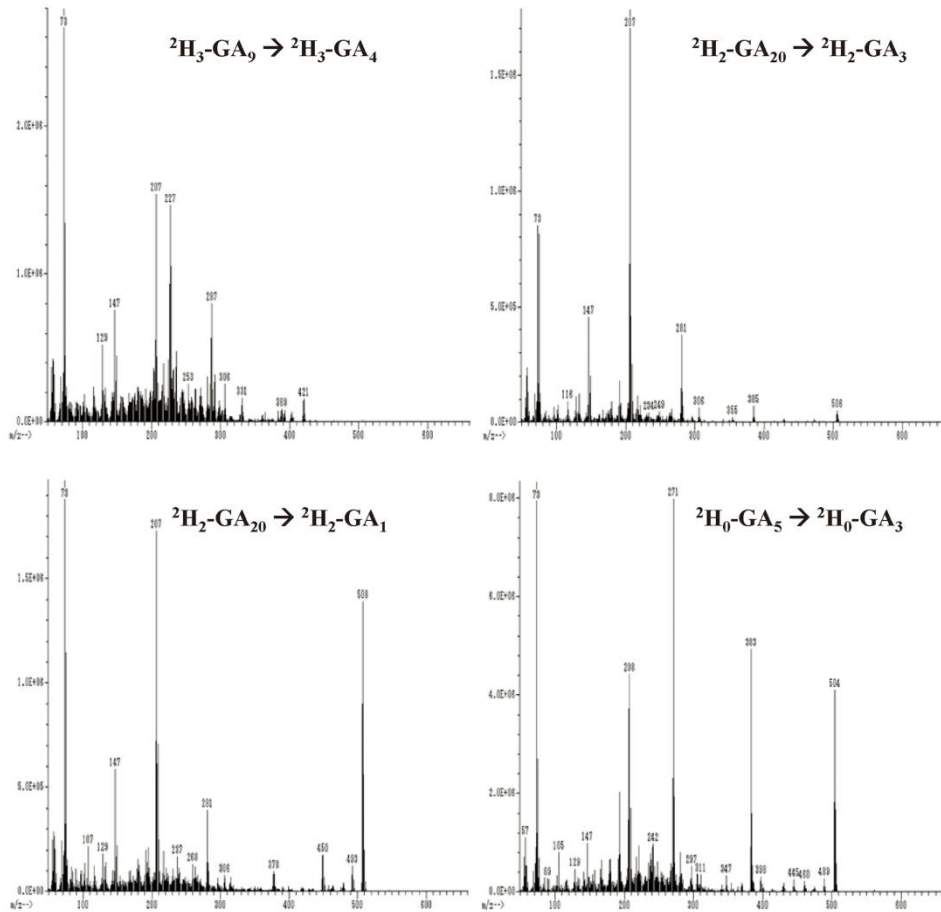

**Supplemental Figure S3. Mass spectrometry analysis of the *in vitro* activity of recombinant GST-ZmGA3ox2 fusion protein.** Purified GST-ZmGA3ox2 was incubated with [ $^2\text{H}_0$ ], [ $^2\text{H}_2$ ] and [ $^2\text{H}_3$ ] GA substrates. The reaction product was analyzed by mass spectrometry.
